# Supplementary material for: Post-combustion emissions control in aero-gas turbine engines
Source: Royal Society of Chemistry journal article supplement (doi:10.1039/d0ee02362k), 2020-12-08
Supplement: d0ee02362k1.pdf [file d0ee02362k1.pdf]

## Supplementary information: Post-Combustion Emissions Control in Aero-Gas Turbine Engines

Prakash Prashanth<sup>1</sup>, Raymond L Speth<sup>1</sup>, Sebastian D Eastham<sup>1</sup>, Jayant S Sabnis<sup>1</sup> and Steven R H Barrett<sup>1,\*</sup>

<sup>1</sup>Laboratory for Aviation and the Environment, Department of Aeronautics and Astronautics,  
Massachusetts Institute of Technology, Cambridge, MA 02139.

\*Corresponding author: Steven R H Barrett ([sbarrett@mit.edu](mailto:sbarrett@mit.edu))

This supplementary information provides details and supporting material to the main text.

### Aviation contribution to atmospheric NO<sub>x</sub> mixing ratios

This section quantifies the aviation attributable NO<sub>x</sub> mixing ratio for the baseline aviation (Figure 1) as well as the post-combustion emissions control (PCEC) with ultra-low sulfur (ULS) fuel scenario (Figure 2). The aviation contribution to cruise altitude (10 – 12 km) NO<sub>x</sub> mixing ratio in the northern hemisphere is approximately 34%, while the use of PCEC with ULS fuel reduces this to approximately 0.25% (the change in burden is based on zonally mass weighted average of NO<sub>x</sub> mixing ratios across the Northern Hemisphere at the typical cruise altitudes).

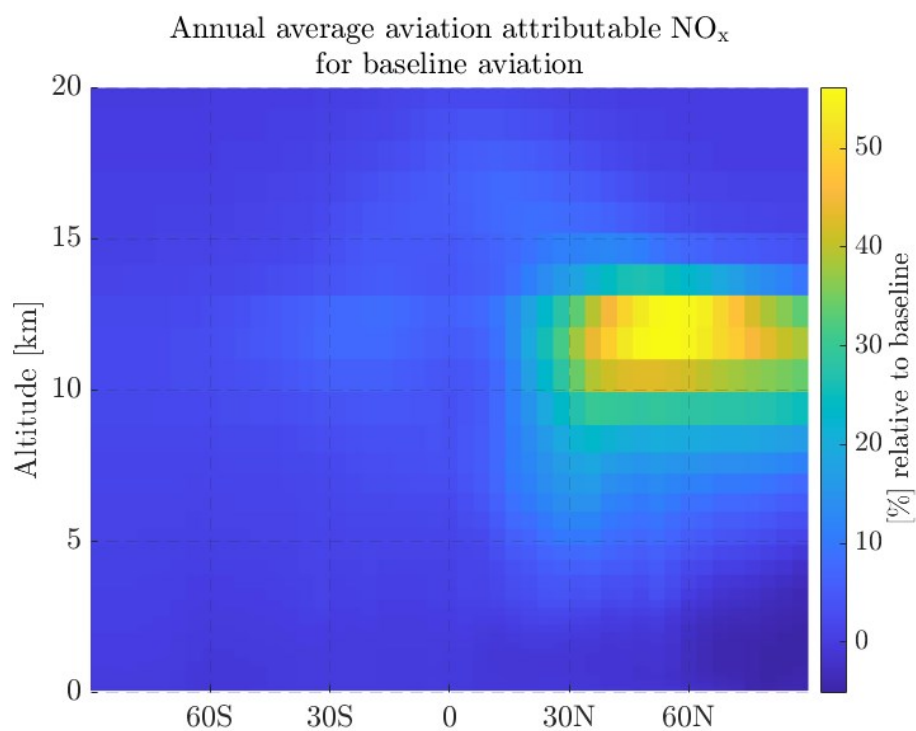

Figure 1: Zonal plot of aviation attributable NO<sub>x</sub> mixing ratio on an annual average basis

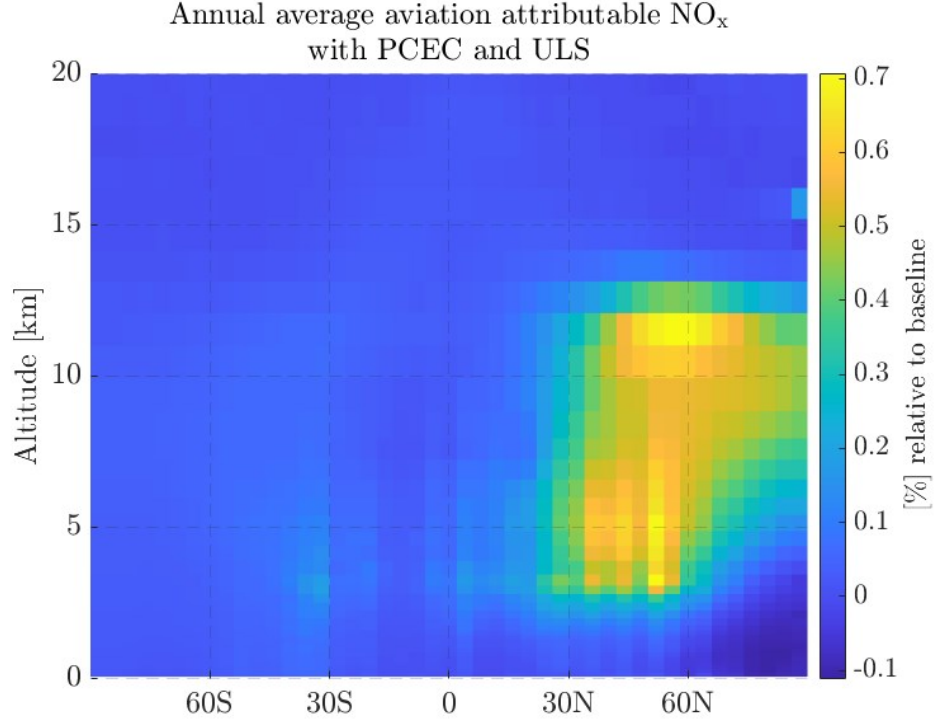

Figure 2: Zonal plot of aviation attributable NO<sub>x</sub> mixing ratios with the use of PCEC along with ULS fuel

## Modified Breguet Range Equation

This section provides a detailed derivation of Eq 2, of section 2.4 in the main text. The rate of change of an aircraft's mass is,

$$\frac{dM_{a/c}}{dt} = -T \times SFC \left( 1 + \frac{\dot{m}_{Red}}{\dot{m}_f} \right),$$

where  $M_{a/c}$  is the aircraft mass,  $\dot{m}_f$  is the mass flow rate of the fuel,  $\dot{m}_{Red}$  is the mass flow rate of the reductant,  $SFC$  is the thrust specific fuel consumption, and  $T$  is the thrust provided by the engine. Using the lift to drag ratio ( $L/D$ ) of the aircraft we can express the thrust as a function of

aircraft mass,  $T = \frac{gM_{a/c}}{L/D}$ . Integrating the above equation gives,

$$M_f = \frac{MLW}{\left( 1 + \frac{\dot{m}_{Red}}{\dot{m}_f} \right)} \left[ \exp \left( gR \frac{SFC \left( 1 + \frac{\dot{m}_{Red}}{\dot{m}_f} \right)}{V \times \frac{L}{D}} \right) - 1 \right].$$

## Surface area of pleated geometry

This section provides the derivation of Eq 3 in the main text. A schematic of a single pleat of a pleated catalyst geometry is shown below. The total flow through area ( $A$ ) of the exhaust flow to be treated is given by,

$$A = 2NL \times s,$$

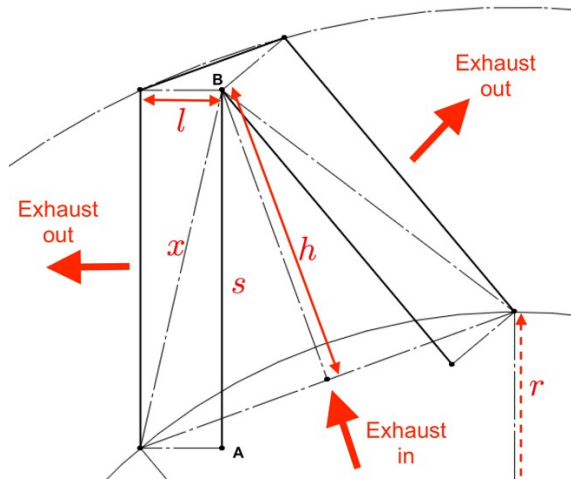

Figure 3: Geometry of pleated catalyst design. A single pleat is shown here. The reacting length and the pleat depth are  $l$  and  $h$  respectively. The radius of the inner circle is  $r$  and the length of the line segment  $AB$  is  $s$ , this represents the actual flow area per unit length perpendicular to the paper

where  $N$  is the number of pleats,  $L$  is the total length of the catalyst and  $s$  is the length of line segment shown in Figure 1. The length  $s$  is given by,

$$s = \sqrt{x^2 - l^2}$$

and

$$x^2 = h^2 + \frac{r^2}{2} \left( 1 - \cos \left( \frac{2\pi}{N} \right) \right),$$

where  $r$  is the internal radius as shown in Figure 1. The total flow area is given by,

$$A = 2NL \sqrt{h^2 + \frac{r^2}{2} \left( 1 - \cos \left( \frac{2\pi}{N} \right) \right) - l^2}.$$
